# Supplementary material for: The long-term impact of the COVID-19 pandemic on physical fitness in young adults: a historical control study
Source: Springer Nature journal article supplement (doi:10.1038/s41598-023-42710-0), 2023-09-18
Supplement: MOESM1 [file 41598_2023_42710_MOESM1_ESM.pdf]

**Supplementary Appendix for:**

**The Long-term Impact of the COVID-19 Pandemic on Physical Fitness in Young Adults: A  
Historical Control Study**

Jeffrey W. Ripley-Gonzalez<sup>1</sup>, Nanjiang Zhou<sup>1</sup>, Tanghao Zeng<sup>1</sup>, Baiyang You<sup>1,2</sup>, Wenliang Zhang<sup>1,2</sup>, Jie Liu<sup>3</sup>, Yuchen Dong<sup>4</sup>, Ying Guo<sup>3</sup>, Yaoshan Dun<sup>1,2,5\*</sup>, Suixin Liu<sup>1,2\*</sup>

1 Division of Cardiac Rehabilitation, Department of Physical Medicine & Rehabilitation, Xiangya Hospital of Central South University, Changsha, Hunan, China

2 National Clinical Research Center for Geriatric Disorders, Xiangya Hospital of Central South University, Changsha, Hunan, China

3 Hunan Traditional Chinese Medical College, Zhuzhou, Hunan, China

4 Medical College of Jinhua Polytechnic, Jinhua, Zhejiang, China

5 Division of Preventive Cardiology, Department of Cardiovascular Medicine, Mayo Clinic, Rochester, MN, USA

**\* Correspondence:** liusuixin@csu.edu.cn (S.L.); dunyaoshan@csu.edu.cn (Ys.D.)

**Running title:** Impact of the COVID-19 Pandemic on Adult Fitness

## Table of Contents

|                                    |      |
|------------------------------------|------|
| <b>Supplementary Figures</b> ..... |      |
| Supplementary Figure 1.....        | 3    |
| Supplementary Figure 2.....        | 4    |
| <b>Supplementary Table</b> .....   | 5-8  |
| <b>STROBE checklist</b> .....      | 9-13 |

## Supplementary Figures

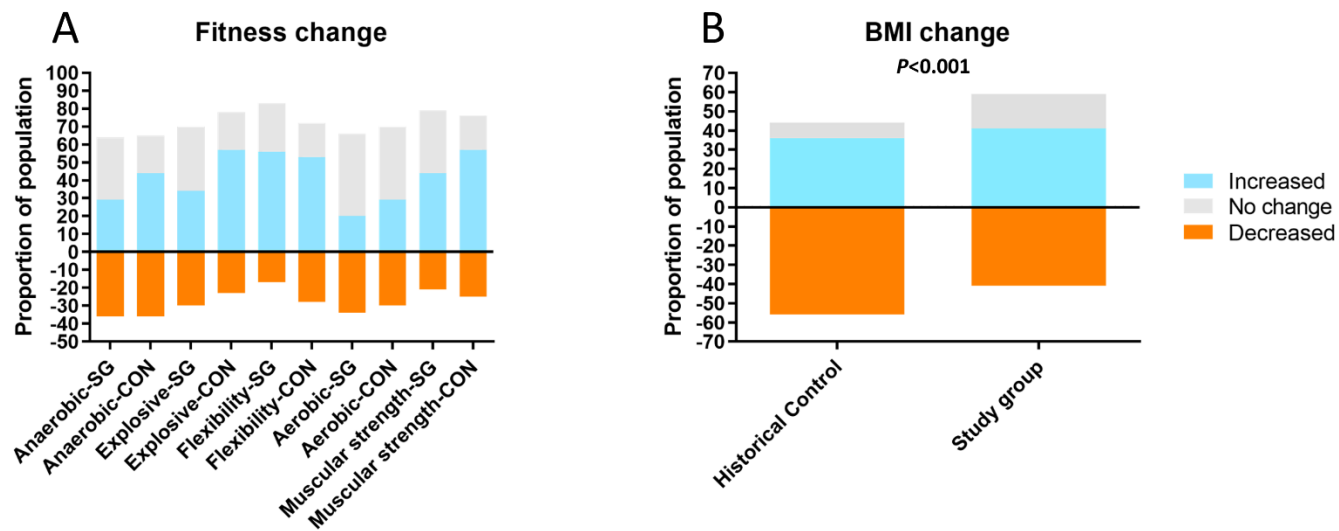

Figure S1. Fitness changes and changes in body mass index as a proportion of the population.

Figure S1A, Changes in fitness, Figure S1B changes in BMI SG- denotes the study group; CON denotes the historical control. BMI. Body mass index.

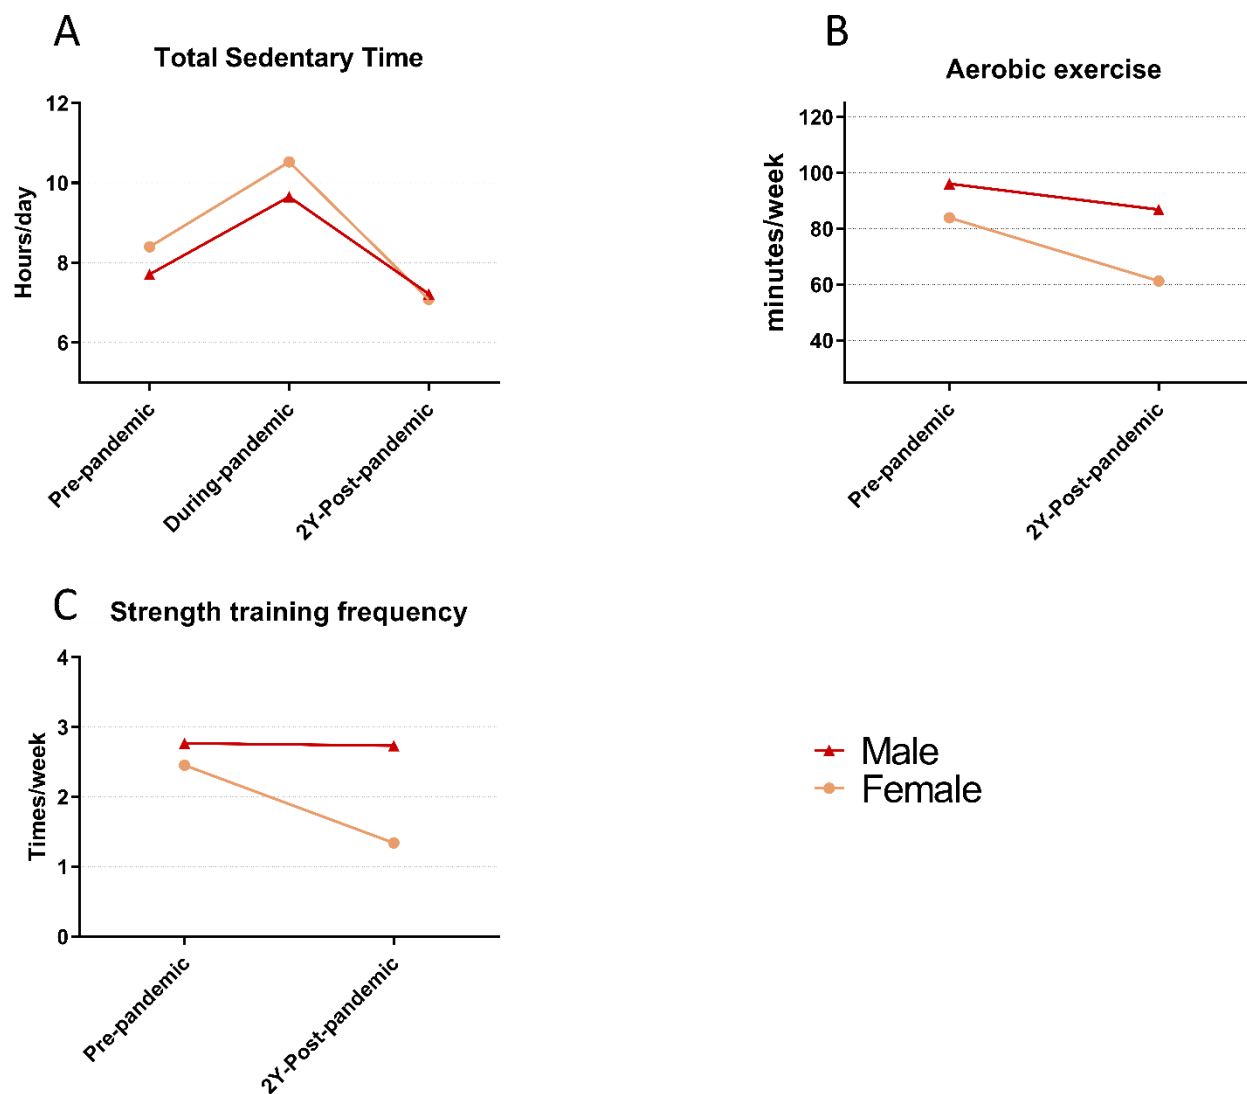

Figure S2. Sedentary and exercise habits of the Study Group.

Pre-pandemic sedentary and exercise habits were recorded at the time of the first Chinese National Student Physical Fitness Standard (CNSPFS), the during-pandemic sedentary time was recorded during lockdowns. The final recording took place one year following the initial recording. A. Shows the changes in mean sedentary time before, during and two years since the start of the COVID-19 pandemic B. Shows the changes in recorded minutes of aerobic exercise a week before and 2 years following the pandemic. C. Shows the changes in recorded minutes in the frequency (days) of strength training per week before and 2 years following the beginning pandemic.

Table S1. Subgroup analyses conducted for urban and rural subgroups to examine the consistency of the primary outcome across different areas.

|                          | Study Group        |              |                  | Historical Control |              |                 |                         |         |
|--------------------------|--------------------|--------------|------------------|--------------------|--------------|-----------------|-------------------------|---------|
|                          | N=1378             |              |                  | N=2024             |              |                 |                         |         |
|                          | Baseline mean (SD) | AFTER        | mean change (SD) | Baseline mean (SD) | AFTER        | mean change(SD) | Mean difference [95%CI] | P Value |
| <b>URBAN</b>             |                    |              |                  |                    |              |                 |                         |         |
| Height (cm)              | 162 (7)            | 162 (7)      | 0.06 (1.46)      | 161.96 (7)         | 163 (7)      | 0.69 (1.51)     | -0.62 [-0.72 to -0.52]  | <0.001  |
| Weight (kg)              | 54.2 (9.2)         | 54.2 (9.8)   | -0.03 (3.9)      | 54.5 (9.8)         | 54.3 (9.9)   | -0.2 (3.8)      | 0.2 [-0.06 to 0.46]     | 0.1     |
| BMI (kg/m <sup>2</sup> ) | 20.7 (3)           | 20.6 (3.1)   | -0.04 (1.5)      | 20.7 (3)           | 20.5 (3.1)   | -0.26 (1.51)    | 0.22 [0.12 to 0.32]     | <0.001  |
| Vital capacity (ml)      | 2934 (646)         | 3012 (673)   | 78 (457)         | 3060 (658)         | 3089 (671)   | 30 (393)        | 7.42 [-17.92 to 32.76]  | 0.6     |
| Total score              | 69 (8)             | 70 (8)       | 1 (6)            | 67 (10)            | 69 (9)       | 3 (8)           | -1.07 [-1.48 to -0.65]  | <0.001  |
| 50m (s)                  | 8.93 (0.91)        | 8.98 (0.92)  | 0.05 (0.52)      | 8.99 (0.94)        | 8.94 (0.98)  | -0.05 (0.62)    | 0.06 [0.03 to 0.1]      | 0.001   |
| Anaerobic fitness        | 71 (10)            | 71 (10)      | -0.7 (8)         | 70 (11)            | 71 (12)      | 0.6 (11)        | -0.63 [-1.26 to 0]      | 0.05    |
| long jump (cm)           | 176.4 (25.5)       | 177.1 (25.7) | 0.7 (13.2)       | 175.3 (25.6)       | 180.2 (25.9) | 5 (12.4)        | -3.54 [-4.35 to -2.73]  | <0.001  |
| Explosive fitness        | 68 (14)            | 69 (14)      | 0.5 (12)         | 65 (16)            | 70 (14)      | 4.5 (13)        | -2.76 [-3.49 to -2.02]  | <0.001  |
| Sit and reach (cm)       | 16.4 (5.5)         | 19.1 (5.6)   | 2.7 (5)          | 15.9 (6.1)         | 17.4 (5.6)   | 1.4 (4.8)       | 1.42 [1.12 to 1.71]     | <0.001  |
| Flexibility              | 76 (12)            | 82 (11)      | 5.5 (12)         | 75 (15)            | 78 (11)      | 3.6 (12)        | 2.58 [1.93 to 3.22]     | <0.001  |
| <b>Male</b>              | N= 217             |              |                  | N=366              |              |                 |                         |         |
| 1000m run (s)            | 249 (23.2)         | 251.1 (24.9) | 2.1 (21.7)       | 251.7 (33.6)       | 247.2 (25.9) | -4.5 (31.9)     | 4.99 [1.22 to 8.76]     | 0.01    |
| Aerobic fitness          | 62 (13)            | 61 (14)      | -1 (13)          | 61 (17)            | 63 (14)      | 2 (16)          | -2.24 [-4.31 to -0.17]  | 0.03    |
| One-minute pull-ups      | 8.8 (5.3)          | 9.4 (5.2)    | 0.5 (3.6)        | 8.6 (5.8)          | 7 (5.1)      | -1.59 (5.79)    | 2.24 [1.52 to 2.96]     | <0.001  |
| Muscular strength        | 45 (34)            | 48 (33)      | 3 (23)           | 42 (35)            | 33 (32)      | -10 (37)        | 13.76 [9.12 to 18.4]    | <0.001  |
| <b>Female</b>            | N=1161             |              |                  | N=1658             |              |                 |                         |         |
| 800m run (s)             | 240 (19.4)         | 244 (20)     | 4.3 (17)         | 238 (25.7)         | 235.7 (20)   | -2.5 (24.9)     | 7.88 [6.57 to 9.19]     | <0.001  |

|                    |            |          |           |            |            |           |                        |        |
|--------------------|------------|----------|-----------|------------|------------|-----------|------------------------|--------|
| Aerobic fitness    | 67 (12)    | 64 (14)  | -3 (13)   | 67 (16)    | 68 (12)    | 2 (16)    | -4.33 [-5.21 to -3.45] | <0.001 |
| One-minute sit-ups | 33.2 (7.7) | 35 (8.2) | 1.8 (6.4) | 31.4 (9.1) | 35.4 (8.3) | 3.9 (7.1) | -1.43 [-1.88 to -0.97] | <0.001 |
| Muscular strength  | 65 (14)    | 67 (14)  | 2 (12)    | 60 (19)    | 67 (14)    | 7 (16)    | -2.04 [-2.91 to -1.18] | <0.001 |

|                          | Study Group        |              |                  | Historical Control |              |                 |                         |         |
|--------------------------|--------------------|--------------|------------------|--------------------|--------------|-----------------|-------------------------|---------|
| <b>RURAL</b>             | N=861              |              |                  | N=1113             |              |                 |                         |         |
|                          | Baseline mean (SD) | AFTER        | mean change (SD) | Baseline mean (SD) | AFTER        | mean change(SD) | Mean difference [95%CI] | P Value |
| Height (cm)              | 160 (6)            | 161 (7)      | 0.14 (1.45)      | 161 (7)            | 162 (7)      | 0.61 (1.38)     | -0.44 [-0.57 to -0.32]  | <0.001  |
| Weight (kg)              | 53.11 (8.9)        | 53.16 (9.39) | 0.04 (3.95)      | 53.46 (9.11)       | 53.15 (9.25) | -0.32 (3.56)    | 0.43 [0.1 to 0.76]      | 0.01    |
| BMI (kg/m <sup>2</sup> ) | 20.5 (2.94)        | 20.47 (3.06) | -0.03 (1.55)     | 20.56 (2.88)       | 20.27 (2.86) | -0.28 (1.4)     | 0.27 [0.14 to 0.4]      | <0.001  |
| Vital capacity (ml)      | 2875 (583)         | 2977 (642)   | 102 (477)        | 3058 (668)         | 3078 (664)   | 19.97 (389.59)  | 36.77 [3.23 to 70.32]   | 0.03    |
| Total score              | 70 (7)             | 71 (8)       | 1 (6)            | 68 (9)             | 70 (8)       | 2 (6)           | -0.8 [-1.32 to -0.29]   | 0.002   |
| 50m (s)                  | 9 (0.9)            | 9.03 (0.89)  | 0.04 (0.53)      | 8.97 (0.9)         | 8.91 (0.94)  | -0.06 (0.58)    | 0.08 [0.03 to 0.12]     | 0.001   |
| Anaerobic fitness        | 71 (10)            | 70 (11)      | -0.7 (9)         | 71 (10)            | 71 (10)      | 0.8 (9)         | -1.17 [-1.93 to -0.42]  | 0.002   |
| long jump (cm)           | 176.7 (24.4)       | 177.5 (24.5) | 0.8 (13.1)       | 177.3 (26.1)       | 181.8 (26.5) | 4.6 (11.9)      | -3.21 [-4.25 to -2.17]  | <0.001  |
| Explosive fitness        | 70 (14)            | 70 (13)      | 0.6 (11)         | 68 (15)            | 71 (13.57)   | 4 (11)          | -2.52 [-3.39 to -1.64]  | <0.001  |
| Sit and reach (cm)       | 16.5 (5.6)         | 19.4 (5.8)   | 2.9 (5.1)        | 16.4 (6.1)         | 17.6 (5.9)   | 1.2 (4.7)       | 1.63 [1.24 to 2.02]     | <0.001  |
| Flexibility              | 76 (12)            | 82 (12)      | 6 (10)           | 75 (15)            | 79 (12)      | 3 (13)          | 3.01 [2.14 to 3.87]     | <0.001  |
| <b>Male</b>              | N=112              |              |                  | N=194              |              |                 |                         |         |
| 1000m run (s)            | 245.5 (25.9)       | 248.5 (25.3) | 3.1 (25.3)       | 249.8 (30.2)       | 247.1 (26)   | -2.7 (27.3)     | 3.59 [-1.53 to 8.71]    | 0.2     |
| Aerobic fitness          | 64 (13)            | 62 (14)      | -2 (14)          | 61 (16)            | 63 (14)      | 2 (15)          | -2.35 [-5.21 to 0.52]   | 0.1     |
| One-minute pull-ups      | 9.2 (5.5)          | 9.2 (5.4)    | -0.04 (4)        | 8.7 (5.5)          | 6.9 (5)      | -1.8 (5.3)      | 2.01 [1.03 to 2.99]     | <0.001  |
| Muscular strength        | 49 (33)            | 48 (33)      | -1 (26)          | 44.21 (34.25)      | 33 (32)      | -11 (34)        | 11.95 [5.65 to 18.24]   | <0.001  |
| <b>Female</b>            | N=749              |              |                  | N=919              |              |                 |                         |         |
| 800m run (s)             | 239.2 (18.8)       | 243.4 (21.6) | 4.1 (18.3)       | 235.7 (21.7)       | 234.9 (19.2) | -0.9 (20.1)     | 6.3 [4.67 to 7.93]      | <0.001  |
| Aerobic fitness          | 67 (12)            | 64 (15)      | -3 (14)          | 68 (13)            | 69 (11)      | 0.8 (13)        | -4.09 [-5.22 to -2.97]  | <0.001  |

|                    |            |            |           |            |           |            |                       |     |
|--------------------|------------|------------|-----------|------------|-----------|------------|-----------------------|-----|
| One-minute sit-ups | 34.3 (7.2) | 36.4 (7.9) | 2.1 (5.9) | 32.3 (8.2) | 35.54 (8) | 3.28 (6.4) | -0.47 [-1.03 to 0.08] | 0.1 |
| Muscular strength  | 67 (11)    | 69 (11)    | 3 (10)    | 62.5 (17)  | 68 (13)   | 5 (13)     | -0.58 [-1.52 to 0.36] | 0.2 |

CI, confidence interval, SD, standard deviation. BMI, body mass index.

Within-group changes for baseline, after and mean changes are expressed as mean (SD). Mean difference for the comparison between the study group and historical control was calculated by the linear mixed models and expressed as mean difference [95% CI].  $P < 0.05$  is considered statistically significant. The score is based on Grading Standards for Chinese university Students. Total score is mean of all other fitness scores, Aerobic fitness, Anaerobic fitness, Explosive fitness, Muscular strength, Vital capacity and flexibility for male and females.



STROBE Statement—checklist of items that should be included in reports of observational studies

|                           | Item No. | Recommendation                                                                                                                                                                                                                                                                                                                                                                                                                                                         | Page No. | Relevant text from manuscript |
|---------------------------|----------|------------------------------------------------------------------------------------------------------------------------------------------------------------------------------------------------------------------------------------------------------------------------------------------------------------------------------------------------------------------------------------------------------------------------------------------------------------------------|----------|-------------------------------|
| <b>Title and abstract</b> | 1        | (a) Indicate the study's design with a commonly used term in the title or the abstract                                                                                                                                                                                                                                                                                                                                                                                 | 1        |                               |
|                           |          | (b) Provide in the abstract an informative and balanced summary of what was done and what was found                                                                                                                                                                                                                                                                                                                                                                    | 2        |                               |
| <b>Introduction</b>       |          |                                                                                                                                                                                                                                                                                                                                                                                                                                                                        |          |                               |
| Background/rationale      | 2        | Explain the scientific background and rationale for the investigation being reported                                                                                                                                                                                                                                                                                                                                                                                   | 3        |                               |
| Objectives                | 3        | State specific objectives, including any prespecified hypotheses                                                                                                                                                                                                                                                                                                                                                                                                       | 3        |                               |
| <b>Methods</b>            |          |                                                                                                                                                                                                                                                                                                                                                                                                                                                                        |          |                               |
| Study design              | 4        | Present key elements of study design early in the paper                                                                                                                                                                                                                                                                                                                                                                                                                | 3-4      |                               |
| Setting                   | 5        | Describe the setting, locations, and relevant dates, including periods of recruitment, exposure, follow-up, and data collection                                                                                                                                                                                                                                                                                                                                        | 3-4      |                               |
| Participants              | 6        | (a) <i>Cohort study</i> —Give the eligibility criteria, and the sources and methods of selection of participants. Describe methods of follow-up<br><i>Case-control study</i> —Give the eligibility criteria, and the sources and methods of case ascertainment and control selection. Give the rationale for the choice of cases and controls<br><i>Cross-sectional study</i> —Give the eligibility criteria, and the sources and methods of selection of participants | 3        |                               |
|                           |          | (b) <i>Cohort study</i> —For matched studies, give matching criteria and number of exposed and unexposed                                                                                                                                                                                                                                                                                                                                                               | 4-5      |                               |

|                                                                                                            |    |                                                                                                                                                                                      |     |
|------------------------------------------------------------------------------------------------------------|----|--------------------------------------------------------------------------------------------------------------------------------------------------------------------------------------|-----|
| <i>Case-control study</i> —For matched studies, give matching criteria and the number of controls per case |    |                                                                                                                                                                                      |     |
| Variables                                                                                                  | 7  | Clearly define all outcomes, exposures, predictors, potential confounders, and effect modifiers. Give diagnostic criteria, if applicable                                             | 4   |
| Data sources/<br>measurement                                                                               | 8* | For each variable of interest, give sources of data and details of methods of assessment (measurement). Describe comparability of assessment methods if there is more than one group | 3-4 |
| Bias                                                                                                       | 9  | Describe any efforts to address potential sources of bias                                                                                                                            | 8   |
| Study size                                                                                                 | 10 | Explain how the study size was arrived at                                                                                                                                            | 4   |

Continued on next page

|                        |     |                                                                                                                                                                                                              |          |
|------------------------|-----|--------------------------------------------------------------------------------------------------------------------------------------------------------------------------------------------------------------|----------|
| Quantitative variables | 11  | Explain how quantitative variables were handled in the analyses. If applicable, describe which groupings were chosen and why                                                                                 | 4        |
| Statistical methods    | 12  | (a) Describe all statistical methods, including those used to control for confounding                                                                                                                        | 4        |
|                        |     | (b) Describe any methods used to examine subgroups and interactions                                                                                                                                          | 4        |
|                        |     | (c) Explain how missing data were addressed                                                                                                                                                                  | 4        |
|                        |     | (d) <i>Cohort study</i> —If applicable, explain how loss to follow-up was addressed                                                                                                                          | 4        |
|                        |     | <i>Case-control study</i> —If applicable, explain how matching of cases and controls was addressed                                                                                                           |          |
|                        |     | <i>Cross-sectional study</i> —If applicable, describe analytical methods taking account of sampling strategy                                                                                                 |          |
|                        |     | (e) Describe any sensitivity analyses                                                                                                                                                                        | 4        |
| <b>Results</b>         |     |                                                                                                                                                                                                              |          |
| Participants           | 13* | (a) Report numbers of individuals at each stage of study—eg numbers potentially eligible, examined for eligibility, confirmed eligible, included in the study, completing follow-up, and analysed            | 5        |
|                        |     | (b) Give reasons for non-participation at each stage                                                                                                                                                         | Figure 1 |
|                        |     | (c) Consider use of a flow diagram                                                                                                                                                                           | Figure 1 |
| Descriptive data       | 14* | (a) Give characteristics of study participants (eg demographic, clinical, social) and information on exposures and potential confounders                                                                     | Table 1  |
|                        |     | (b) Indicate number of participants with missing data for each variable of interest                                                                                                                          | N/A      |
|                        |     | (c) <i>Cohort study</i> —Summarise follow-up time (eg, average and total amount)                                                                                                                             | 5        |
| Outcome data           | 15* | <i>Cohort study</i> —Report numbers of outcome events or summary measures over time                                                                                                                          | N/A      |
|                        |     | <i>Case-control study</i> —Report numbers in each exposure category, or summary measures of exposure                                                                                                         | N/A      |
|                        |     | <i>Cross-sectional study</i> —Report numbers of outcome events or summary measures                                                                                                                           | N/A      |
| Main results           | 16  | (a) Give unadjusted estimates and, if applicable, confounder-adjusted estimates and their precision (eg, 95% confidence interval). Make clear which confounders were adjusted for and why they were included | 5        |
|                        |     | (b) Report category boundaries when continuous variables were categorized                                                                                                                                    | 4        |

---

(c) If relevant, consider translating estimates of relative risk into absolute risk for a meaningful time period

---

N/A

Continued on next page

|                          |    |                                                                                                                                                                            |     |
|--------------------------|----|----------------------------------------------------------------------------------------------------------------------------------------------------------------------------|-----|
| Other analyses           | 17 | Report other analyses done—eg analyses of subgroups and interactions, and sensitivity analyses                                                                             | 5-6 |
| <b>Discussion</b>        |    |                                                                                                                                                                            |     |
| Key results              | 18 | Summarise key results with reference to study objectives                                                                                                                   | 6   |
| Limitations              | 19 | Discuss limitations of the study, taking into account sources of potential bias or imprecision.<br>Discuss both direction and magnitude of any potential bias              | 7   |
| Interpretation           | 20 | Give a cautious overall interpretation of results considering objectives, limitations, multiplicity of analyses, results from similar studies, and other relevant evidence | 7   |
| Generalisability         | 21 | Discuss the generalisability (external validity) of the study results                                                                                                      | 7   |
| <b>Other information</b> |    |                                                                                                                                                                            |     |
| Funding                  | 22 | Give the source of funding and the role of the funders for the present study and, if applicable, for the original study on which the present article is based              | 10  |

\*Give information separately for cases and controls in case-control studies and, if applicable, for exposed and unexposed groups in cohort and cross-sectional studies.
